# Supplementary material for: Automatic On-Line Purge-and-Trap Sequential Injection Analysis for Trace Ammonium Determination in Untreated Estuarine and Seawater Samples
Source: MDPI journal article supplement (doi:10.3390/molecules25071569), 2020-03-29
Supplement: s1 [file s1]

## Supplementary Materials

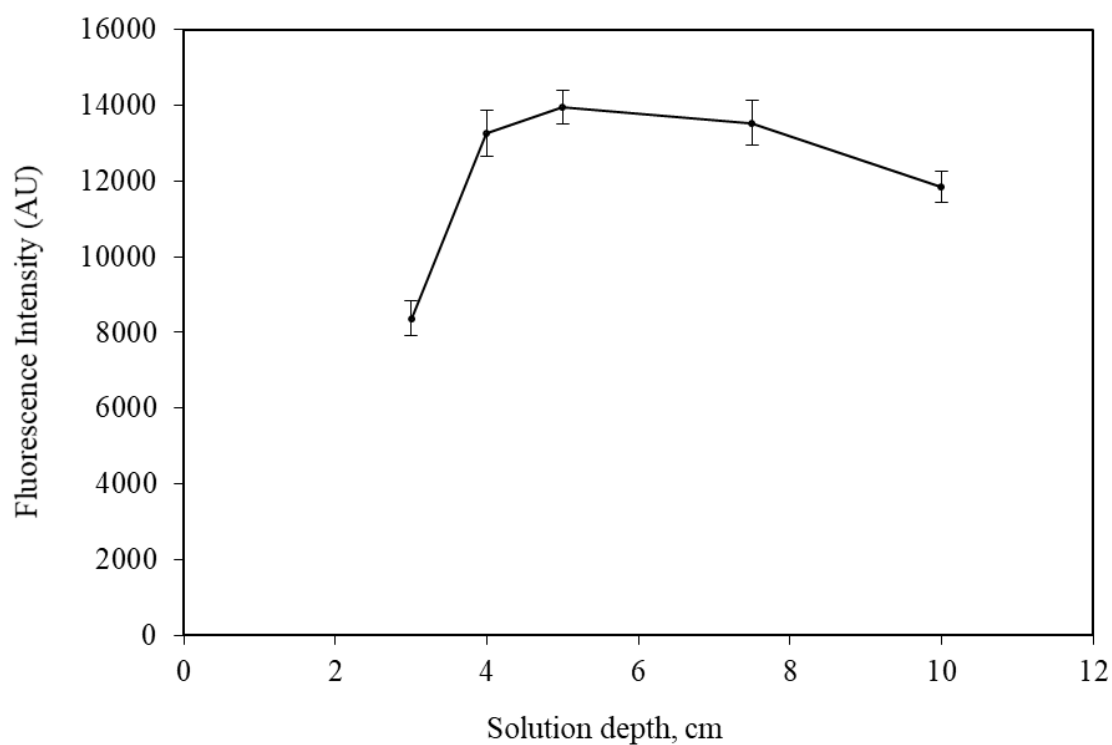

**Figure S1.** Effect of solution depth in purge-vessel on intensity of  $5.0 \mu\text{g NH}_4^+$ . Error bars were calculated based on standard deviation ( $\pm 1s$ ). NaOH volume =  $1000 \mu\text{L}$  ( $1.0 \text{ mol L}^{-1}$  NaOH); Trapping solution:  $300 \mu\text{L}$ ,  $0.001 \text{ mol L}^{-1}$  HCl; Purge-gas flow rate =  $75 \text{ mL min}^{-1}$ .

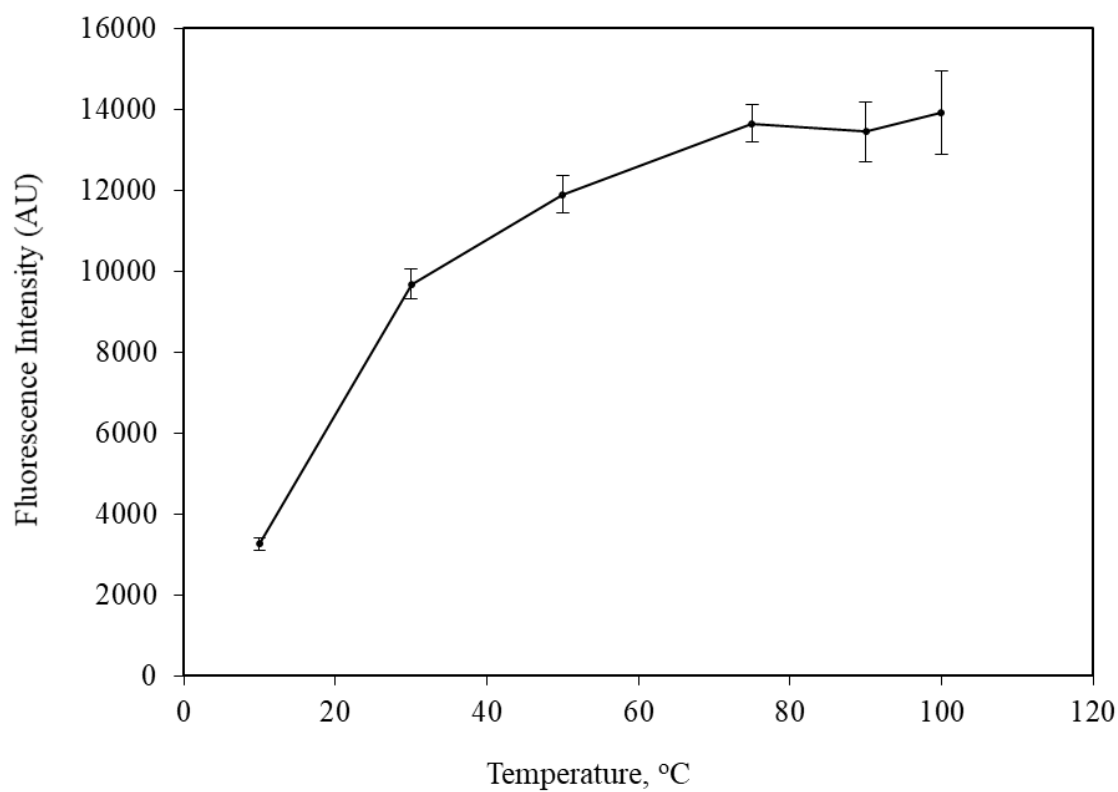

**Figure S2.** Effect of purge-gas flow rate of the on the sensitivity of the method. Error bars were calculated based on standard deviation ( $\pm 1s$ ). Other parameters as in Fig. S1. .

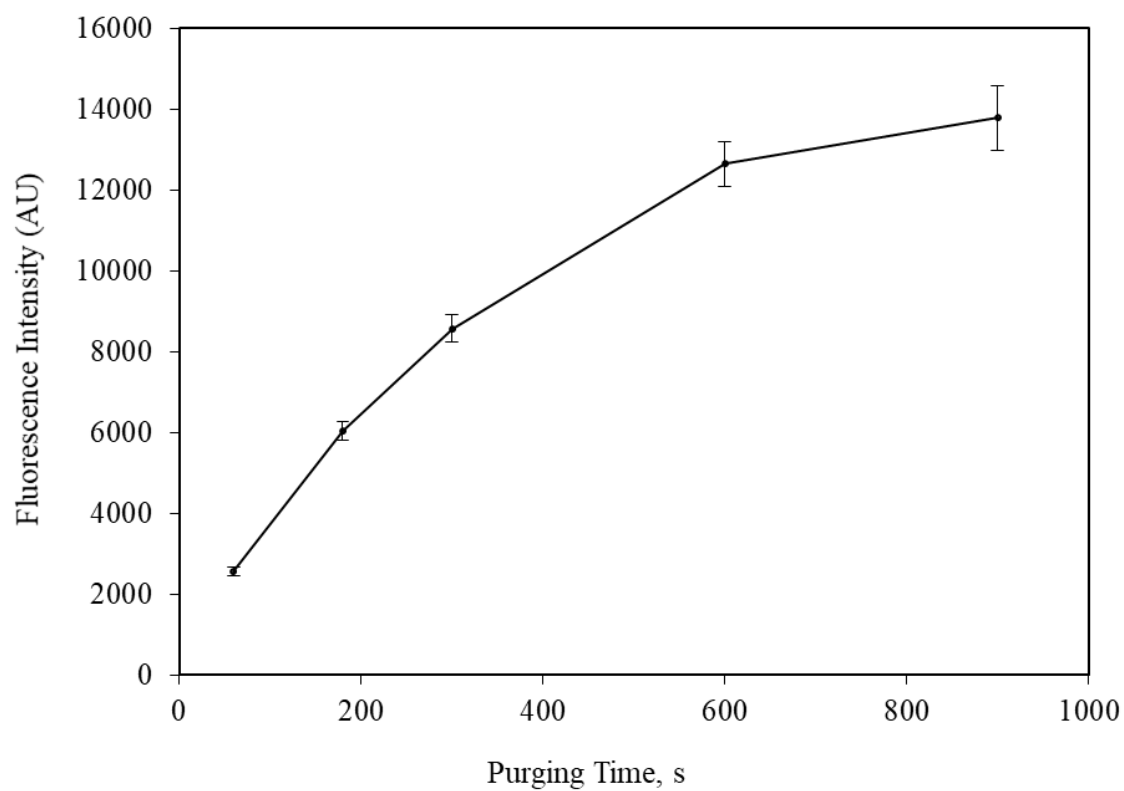

**Figure S3.** Effect of purging time on the fluorescence intensity of  $50.0 \mu\text{g L}^{-1} \text{NH}_4^+$ . Error bars were calculated based on standard deviation ( $\pm 1\text{s}$ ). All other parameters as in Fig. S1..
